# Supplementary material for: Electronic structure and magnetic properties of a trigonal prismatic CuII6 cluster
Source: Royal Society of Chemistry journal article supplement (doi:10.1039/b907805c), 2009-01-01
Supplement: b907805c.pdf [file b907805c.pdf]

# **Electronic structure and magnetic properties of a trigonal prismatic Cu<sup>II</sup><sub>6</sub> cluster**

Ekaterina Zueva, Maria M. Petrova, Radovan Herchel, Zdeněk Trávníček, Raphael G. Raptis, Logesh  
Mathivathanan and John E. McGrady

## **Supplementary information**

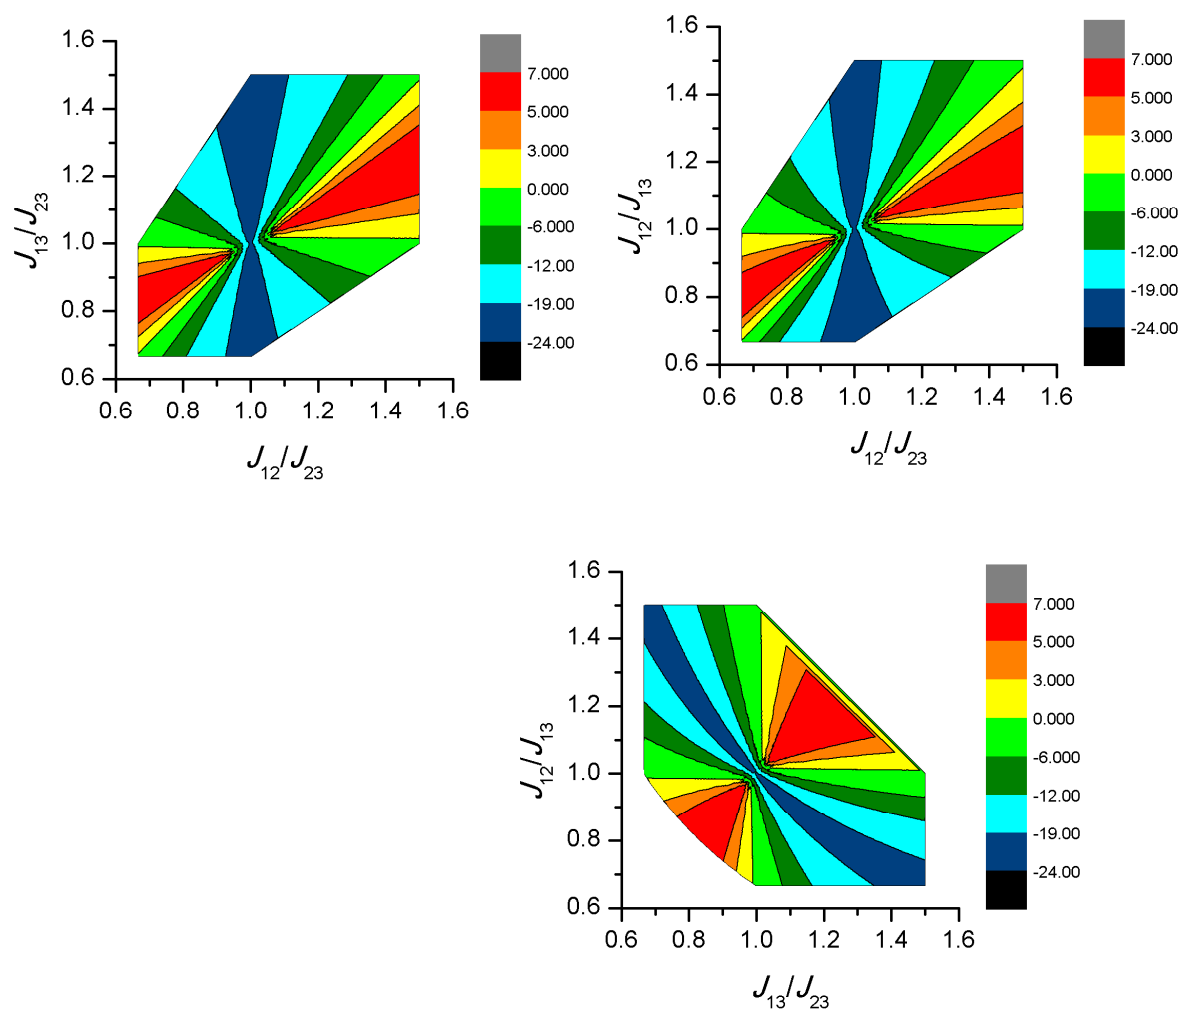

Fig. S1 The energy difference between the ground and first excited states (computed within the  $H(4)^{HDVV}$  model) depending on the ratios of intra-triangle  $J_{ij}$ . Positive values correspond to the triplet ground state, negative – to the singlet ground state.  $J_{14} = -20 \text{ cm}^{-1}$  (fixed),  $J_{12}$ ,  $J_{13}$  and  $J_{23}$  were varying from  $-400$  to  $-600 \text{ cm}^{-1}$ .

**Table S1:** SCF single determinants computed for  $1^-$ : atomic spin densities, computed  $\langle S^2 \rangle$  values and energies (in a.u.).

|                                                           | Atomic spin density                                                                                                                                         | $\langle S^2 \rangle$ | $E$            |
|-----------------------------------------------------------|-------------------------------------------------------------------------------------------------------------------------------------------------------------|-----------------------|----------------|
| HS: $ \alpha\alpha\alpha\alpha\alpha\rangle$              | Cu <sub>1</sub> : 0.59    Cu <sub>4</sub> : 0.58<br>Cu <sub>2</sub> : 0.59    Cu <sub>5</sub> : 0.59<br>Cu <sub>3</sub> : 0.59    Cu <sub>6</sub> : 0.59    | 12.019                | -13407.5090202 |
| BS <sub>1</sub> : $ \alpha\alpha\beta\beta\alpha\rangle$  | Cu <sub>1</sub> : 0.56    Cu <sub>4</sub> : -0.56<br>Cu <sub>2</sub> : 0.56    Cu <sub>5</sub> : 0.55<br>Cu <sub>3</sub> : -0.54    Cu <sub>6</sub> : -0.56 | 2.746                 | -13407.5215044 |
| BS <sub>2</sub> : $ \alpha\beta\alpha\alpha\beta\rangle$  | Cu <sub>1</sub> : 0.56    Cu <sub>4</sub> : 0.54<br>Cu <sub>2</sub> : -0.55    Cu <sub>5</sub> : -0.56<br>Cu <sub>3</sub> : 0.56    Cu <sub>6</sub> : -0.56 | 2.744                 | -13407.5216433 |
| BS <sub>3</sub> : $ \alpha\alpha\beta\beta\alpha\rangle$  | Cu <sub>1</sub> : 0.56    Cu <sub>4</sub> : -0.56<br>Cu <sub>2</sub> : 0.56    Cu <sub>5</sub> : -0.56<br>Cu <sub>3</sub> : -0.54    Cu <sub>6</sub> : 0.55 | 2.748                 | -13407.5214552 |
| BS <sub>4</sub> : $ \alpha\beta\beta\alpha\alpha\rangle$  | Cu <sub>1</sub> : -0.55    Cu <sub>4</sub> : -0.56<br>Cu <sub>2</sub> : 0.56    Cu <sub>5</sub> : 0.55<br>Cu <sub>3</sub> : 0.56    Cu <sub>6</sub> : -0.56 | 2.757                 | -13407.5206636 |
| BS <sub>5</sub> : $ \alpha\alpha\alpha\beta\beta\rangle$  | Cu <sub>1</sub> : 0.59    Cu <sub>4</sub> : -0.59<br>Cu <sub>2</sub> : 0.59    Cu <sub>5</sub> : -0.59<br>Cu <sub>3</sub> : 0.59    Cu <sub>6</sub> : -0.59 | 3.011                 | -13407.5095703 |
| BS <sub>6</sub> : $ \alpha\beta\alpha\beta\alpha\rangle$  | Cu <sub>1</sub> : 0.56    Cu <sub>4</sub> : -0.56<br>Cu <sub>2</sub> : -0.55    Cu <sub>5</sub> : -0.56<br>Cu <sub>3</sub> : 0.56    Cu <sub>6</sub> : 0.55 | 2.754                 | -13407.5209101 |
| BS <sub>7</sub> : $ \alpha\beta\beta\alpha\alpha\rangle$  | Cu <sub>1</sub> : -0.55    Cu <sub>4</sub> : 0.54<br>Cu <sub>2</sub> : 0.56    Cu <sub>5</sub> : -0.56<br>Cu <sub>3</sub> : 0.56    Cu <sub>6</sub> : -0.56 | 2.750                 | -13407.5213565 |
| BS <sub>8</sub> : $ \alpha\alpha\beta\alpha\beta\rangle$  | Cu <sub>1</sub> : 0.56    Cu <sub>4</sub> : 0.54<br>Cu <sub>2</sub> : 0.56    Cu <sub>5</sub> : -0.56<br>Cu <sub>3</sub> : -0.54    Cu <sub>6</sub> : -0.56 | 2.740                 | -13407.5219403 |
| BS <sub>9</sub> : $ \alpha\beta\beta\alpha\alpha\rangle$  | Cu <sub>1</sub> : -0.55    Cu <sub>4</sub> : -0.56<br>Cu <sub>2</sub> : 0.56    Cu <sub>5</sub> : -0.56<br>Cu <sub>3</sub> : 0.56    Cu <sub>6</sub> : 0.55 | 2.762                 | -13407.5203681 |
| BS <sub>10</sub> : $ \alpha\beta\alpha\beta\alpha\rangle$ | Cu <sub>1</sub> : 0.56    Cu <sub>4</sub> : -0.56<br>Cu <sub>2</sub> : -0.55    Cu <sub>5</sub> : 0.55<br>Cu <sub>3</sub> : 0.56    Cu <sub>6</sub> : -0.56 | 2.747                 | -13407.5214843 |
| BS <sub>11</sub> : $ \alpha\alpha\beta\alpha\beta\rangle$ | Cu <sub>1</sub> : 0.56    Cu <sub>4</sub> : 0.56<br>Cu <sub>2</sub> : 0.56    Cu <sub>5</sub> : 0.56<br>Cu <sub>3</sub> : -0.55    Cu <sub>6</sub> : -0.55  | 3.753                 | -13407.5210123 |
| BS <sub>12</sub> : $ \alpha\beta\alpha\alpha\beta\rangle$ | Cu <sub>1</sub> : 0.56    Cu <sub>4</sub> : 0.56<br>Cu <sub>2</sub> : -0.55    Cu <sub>5</sub> : -0.55<br>Cu <sub>3</sub> : 0.56    Cu <sub>6</sub> : 0.56  | 3.752                 | -13407.5210414 |

|                                                            |                                                                              |                                                                              |       |                |
|------------------------------------------------------------|------------------------------------------------------------------------------|------------------------------------------------------------------------------|-------|----------------|
| BS <sub>13</sub> : $ \beta\alpha\alpha\beta\alpha\rangle$  | Cu <sub>1</sub> : -0.55<br>Cu <sub>2</sub> : 0.56<br>Cu <sub>3</sub> : 0.56  | Cu <sub>4</sub> : -0.54<br>Cu <sub>5</sub> : 0.56<br>Cu <sub>6</sub> : 0.56  | 3.755 | -13407.520912  |
| BS <sub>14</sub> : $ \alpha\alpha\alpha\beta\beta\rangle$  | Cu <sub>1</sub> : 0.59<br>Cu <sub>2</sub> : 0.59<br>Cu <sub>3</sub> : 0.59   | Cu <sub>4</sub> : 0.54<br>Cu <sub>5</sub> : -0.56<br>Cu <sub>6</sub> : -0.56 | 3.875 | -13407.5157909 |
| BS <sub>15</sub> : $ \alpha\alpha\alpha\beta\alpha\rangle$ | Cu <sub>1</sub> : 0.59<br>Cu <sub>2</sub> : 0.59<br>Cu <sub>3</sub> : 0.59   | Cu <sub>4</sub> : -0.56<br>Cu <sub>5</sub> : 0.55<br>Cu <sub>6</sub> : -0.56 | 3.880 | -13407.5153546 |
| BS <sub>16</sub> : $ \alpha\alpha\alpha\beta\beta\rangle$  | Cu <sub>1</sub> : 0.59<br>Cu <sub>2</sub> : 0.59<br>Cu <sub>3</sub> : 0.59   | Cu <sub>4</sub> : -0.56<br>Cu <sub>5</sub> : -0.56<br>Cu <sub>6</sub> : 0.55 | 3.885 | -13407.5150618 |
| BS <sub>17</sub> : $ \alpha\beta\alpha\alpha\beta\rangle$  | Cu <sub>1</sub> : 0.56<br>Cu <sub>2</sub> : -0.55<br>Cu <sub>3</sub> : 0.56  | Cu <sub>4</sub> : 0.56<br>Cu <sub>5</sub> : 0.56<br>Cu <sub>6</sub> : -0.55  | 3.753 | -13407.5210539 |
| BS <sub>18</sub> : $ \beta\alpha\alpha\alpha\beta\rangle$  | Cu <sub>1</sub> : -0.55<br>Cu <sub>2</sub> : 0.56<br>Cu <sub>3</sub> : 0.56  | Cu <sub>4</sub> : 0.55<br>Cu <sub>5</sub> : -0.55<br>Cu <sub>6</sub> : 0.56  | 3.756 | -13407.5208161 |
| BS <sub>19</sub> : $ \alpha\alpha\beta\beta\alpha\rangle$  | Cu <sub>1</sub> : 0.56<br>Cu <sub>2</sub> : 0.56<br>Cu <sub>3</sub> : -0.54  | Cu <sub>4</sub> : -0.54<br>Cu <sub>5</sub> : 0.56<br>Cu <sub>6</sub> : 0.56  | 3.740 | -13407.5220581 |
| BS <sub>20</sub> : $ \beta\alpha\alpha\alpha\beta\rangle$  | Cu <sub>1</sub> : -0.55<br>Cu <sub>2</sub> : 0.56<br>Cu <sub>3</sub> : 0.56  | Cu <sub>4</sub> : 0.56<br>Cu <sub>5</sub> : 0.56<br>Cu <sub>6</sub> : -0.55  | 3.760 | -13407.5204885 |
| BS <sub>21</sub> : $ \alpha\alpha\beta\alpha\beta\rangle$  | Cu <sub>1</sub> : 0.56<br>Cu <sub>2</sub> : 0.56<br>Cu <sub>3</sub> : -0.54  | Cu <sub>4</sub> : 0.55<br>Cu <sub>5</sub> : -0.55<br>Cu <sub>6</sub> : 0.56  | 3.745 | -13407.5216451 |
| BS <sub>22</sub> : $ \alpha\beta\alpha\beta\alpha\rangle$  | Cu <sub>1</sub> : 0.56<br>Cu <sub>2</sub> : -0.55<br>Cu <sub>3</sub> : 0.56  | Cu <sub>4</sub> : -0.54<br>Cu <sub>5</sub> : 0.56<br>Cu <sub>6</sub> : 0.56  | 3.743 | -13407.5217933 |
| BS <sub>23</sub> : $ \alpha\beta\beta\alpha\alpha\rangle$  | Cu <sub>1</sub> : 0.55<br>Cu <sub>2</sub> : -0.56<br>Cu <sub>3</sub> : -0.56 | Cu <sub>4</sub> : 0.58<br>Cu <sub>5</sub> : 0.59<br>Cu <sub>6</sub> : 0.59   | 3.887 | -13407.5149062 |
| BS <sub>24</sub> : $ \beta\alpha\beta\alpha\alpha\rangle$  | Cu <sub>1</sub> : -0.56<br>Cu <sub>2</sub> : 0.55<br>Cu <sub>3</sub> : -0.56 | Cu <sub>4</sub> : 0.58<br>Cu <sub>5</sub> : 0.59<br>Cu <sub>6</sub> : 0.59   | 3.879 | -13407.5154481 |
| BS <sub>25</sub> : $ \beta\beta\alpha\alpha\alpha\rangle$  | Cu <sub>1</sub> : -0.56<br>Cu <sub>2</sub> : -0.56<br>Cu <sub>3</sub> : 0.54 | Cu <sub>4</sub> : 0.58<br>Cu <sub>5</sub> : 0.59<br>Cu <sub>6</sub> : 0.59   | 3.875 | -13407.5157415 |
|                                                            |                                                                              |                                                                              |       |                |
| BS <sub>26</sub> : $ \alpha\alpha\alpha\alpha\beta\rangle$ | Cu <sub>1</sub> : 0.59<br>Cu <sub>2</sub> : 0.59<br>Cu <sub>3</sub> : 0.59   | Cu <sub>4</sub> : 0.56<br>Cu <sub>5</sub> : 0.56<br>Cu <sub>6</sub> : -0.55  | 6.887 | -13407.5148725 |
| BS <sub>27</sub> : $ \alpha\alpha\alpha\alpha\beta\rangle$ | Cu <sub>1</sub> : 0.59<br>Cu <sub>2</sub> : 0.59<br>Cu <sub>3</sub> : 0.59   | Cu <sub>4</sub> : 0.55<br>Cu <sub>5</sub> : -0.55<br>Cu <sub>6</sub> : 0.56  | 6.882 | -13407.5152097 |
| BS <sub>28</sub> : $ \alpha\alpha\alpha\beta\alpha\rangle$ | Cu <sub>1</sub> : 0.59<br>Cu <sub>2</sub> : 0.59<br>Cu <sub>3</sub> : 0.59   | Cu <sub>4</sub> : -0.54<br>Cu <sub>5</sub> : 0.56<br>Cu <sub>6</sub> : 0.56  | 6.877 | -13407.5156257 |
| BS <sub>29</sub> : $ \alpha\alpha\beta\alpha\alpha\rangle$ | Cu <sub>1</sub> : 0.56                                                       | Cu <sub>4</sub> : 0.58                                                       | 6.878 | -13407.5155716 |

|                                                                      |                                                                                                                                                          |       |                |
|----------------------------------------------------------------------|----------------------------------------------------------------------------------------------------------------------------------------------------------|-------|----------------|
|                                                                      | Cu <sub>2</sub> : 0.56    Cu <sub>5</sub> : 0.59<br>Cu <sub>3</sub> :-0.55    Cu <sub>6</sub> : 0.59                                                     |       |                |
| BS <sub>30</sub> :   $\alpha\beta\alpha\alpha\alpha\alpha$ $\rangle$ | Cu <sub>1</sub> : 0.56    Cu <sub>4</sub> : 0.58<br>Cu <sub>2</sub> :-0.55    Cu <sub>5</sub> : 0.59<br>Cu <sub>3</sub> : 0.56    Cu <sub>6</sub> : 0.59 | 6.881 | -13407.5152981 |
| BS <sub>31</sub> :   $\beta\alpha\alpha\alpha\alpha\alpha$ $\rangle$ | Cu <sub>1</sub> :-0.55    Cu <sub>4</sub> : 0.58<br>Cu <sub>2</sub> : 0.56    Cu <sub>5</sub> : 0.59<br>Cu <sub>3</sub> : 0.56    Cu <sub>6</sub> : 0.59 | 6.889 | -13407.5147255 |

**Table S2:** SCF single determinants computed for  $D_{3h}$ -optimized HS-state structure of **1**<sup>+</sup>: atomic spin densities, computed  $\langle S^2 \rangle$  values and energies (in a.u.).

|                                                                                                                                                                                                                                                                                                                           | Atomic spin density                                                                                                                                      | $\langle S^2 \rangle$ | $E$            |
|---------------------------------------------------------------------------------------------------------------------------------------------------------------------------------------------------------------------------------------------------------------------------------------------------------------------------|----------------------------------------------------------------------------------------------------------------------------------------------------------|-----------------------|----------------|
| HS:   $\alpha\alpha\alpha\alpha\alpha\alpha$ $\rangle$                                                                                                                                                                                                                                                                    | Cu <sub>1</sub> :0.59    Cu <sub>4</sub> : 0.59<br>Cu <sub>2</sub> :0.59    Cu <sub>5</sub> : 0.59<br>Cu <sub>3</sub> :0.59    Cu <sub>6</sub> : 0.59    | 12.020                | -13408.769351  |
| BS1:   $\alpha\alpha\alpha\beta\beta\beta$ $\rangle$                                                                                                                                                                                                                                                                      | Cu <sub>1</sub> : 0.59    Cu <sub>4</sub> :-0.59<br>Cu <sub>2</sub> : 0.59    Cu <sub>5</sub> :-0.59<br>Cu <sub>3</sub> : 0.59    Cu <sub>6</sub> :-0.59 | 3.008                 | -13408.7700751 |
| BS2:   $\alpha\beta\alpha\beta\alpha\beta$ $\rangle$<br>  $\alpha\alpha\beta\beta\beta\alpha$ $\rangle$<br>  $\alpha\beta\beta\beta\alpha\alpha$ $\rangle$                                                                                                                                                                | Cu <sub>1</sub> : 0.57    Cu <sub>4</sub> :-0.57<br>Cu <sub>2</sub> :-0.55    Cu <sub>5</sub> : 0.55<br>Cu <sub>3</sub> : 0.57    Cu <sub>6</sub> :-0.57 | 2.767                 | -13408.7800948 |
| BS3:   $\alpha\alpha\beta\alpha\beta\beta$ $\rangle$<br>  $\alpha\beta\beta\alpha\beta\alpha$ $\rangle$<br>  $\alpha\beta\alpha\beta\beta\alpha$ $\rangle$<br>  $\alpha\alpha\beta\beta\alpha\beta$ $\rangle$<br>  $\alpha\beta\beta\alpha\alpha\beta$ $\rangle$<br>  $\alpha\beta\alpha\alpha\beta\beta$ $\rangle$       | Cu <sub>1</sub> :-0.57    Cu <sub>4</sub> :-0.56<br>Cu <sub>2</sub> :-0.57    Cu <sub>5</sub> : 0.57<br>Cu <sub>3</sub> : 0.56    Cu <sub>6</sub> : 0.57 | 2.772                 | -13408.779736  |
| BS4:   $\alpha\alpha\beta\alpha\alpha\beta$ $\rangle$<br>  $\alpha\beta\alpha\alpha\beta\alpha$ $\rangle$<br>  $\beta\alpha\alpha\beta\alpha\alpha$ $\rangle$                                                                                                                                                             | Cu <sub>1</sub> : 0.57    Cu <sub>4</sub> : 0.57<br>Cu <sub>2</sub> : 0.57    Cu <sub>5</sub> : 0.57<br>Cu <sub>3</sub> :-0.56    Cu <sub>6</sub> :-0.56 | 3.776                 | -13408.7794931 |
| BS5:   $\alpha\alpha\alpha\beta\alpha\beta$ $\rangle$<br>  $\alpha\alpha\alpha\alpha\beta\beta$ $\rangle$<br>  $\alpha\alpha\alpha\beta\beta\alpha$ $\rangle$<br>  $\alpha\beta\beta\alpha\alpha\alpha$ $\rangle$<br>  $\beta\alpha\beta\alpha\alpha\alpha$ $\rangle$<br>  $\beta\beta\alpha\alpha\alpha\alpha$ $\rangle$ | Cu <sub>1</sub> : 0.59    Cu <sub>4</sub> :-0.57<br>Cu <sub>2</sub> : 0.59    Cu <sub>5</sub> : 0.56<br>Cu <sub>3</sub> : 0.59    Cu <sub>6</sub> :-0.57 | 3.890                 | -13408.7749214 |
| BS6:   $\alpha\alpha\beta\alpha\beta\alpha$ $\rangle$<br>  $\beta\alpha\alpha\alpha\alpha\beta$ $\rangle$<br>  $\alpha\beta\alpha\beta\alpha\alpha$ $\rangle$<br>  $\alpha\beta\alpha\alpha\alpha\beta$ $\rangle$<br>  $\beta\alpha\alpha\alpha\beta\alpha$ $\rangle$<br>  $\alpha\alpha\beta\beta\alpha\alpha$ $\rangle$ | Cu <sub>1</sub> : 0.57    Cu <sub>4</sub> : 0.57<br>Cu <sub>2</sub> : 0.57    Cu <sub>5</sub> :-0.56<br>Cu <sub>3</sub> :-0.56    Cu <sub>6</sub> : 0.57 | 3.771                 | -13408.7799272 |
| BS7:   $\alpha\alpha\alpha\beta\alpha\alpha$ $\rangle$<br>  $\alpha\alpha\beta\alpha\alpha\alpha$ $\rangle$<br>  $\alpha\beta\alpha\alpha\alpha\alpha$ $\rangle$<br>  $\beta\alpha\alpha\alpha\alpha\alpha$ $\rangle$<br>  $\alpha\alpha\alpha\alpha\alpha\beta$ $\rangle$                                                | Cu <sub>1</sub> : 0.59    Cu <sub>4</sub> :-0.56<br>Cu <sub>2</sub> : 0.59    Cu <sub>5</sub> : 0.57<br>Cu <sub>3</sub> : 0.59    Cu <sub>6</sub> : 0.57 | 6.893                 | -13408.7747005 |

|                                   |  |  |  |
|-----------------------------------|--|--|--|
| $ \alpha\alpha\alpha\beta\rangle$ |  |  |  |
|-----------------------------------|--|--|--|
